# Supplementary material for: The Association between Accumulation of Toxic Advanced Glycation End-Products and Cytotoxic Effect in MC3T3-E1 Cells
Source: MDPI journal article supplement (doi:10.3390/nu14050990), 2022-02-26
Supplement: s1 [file s1]

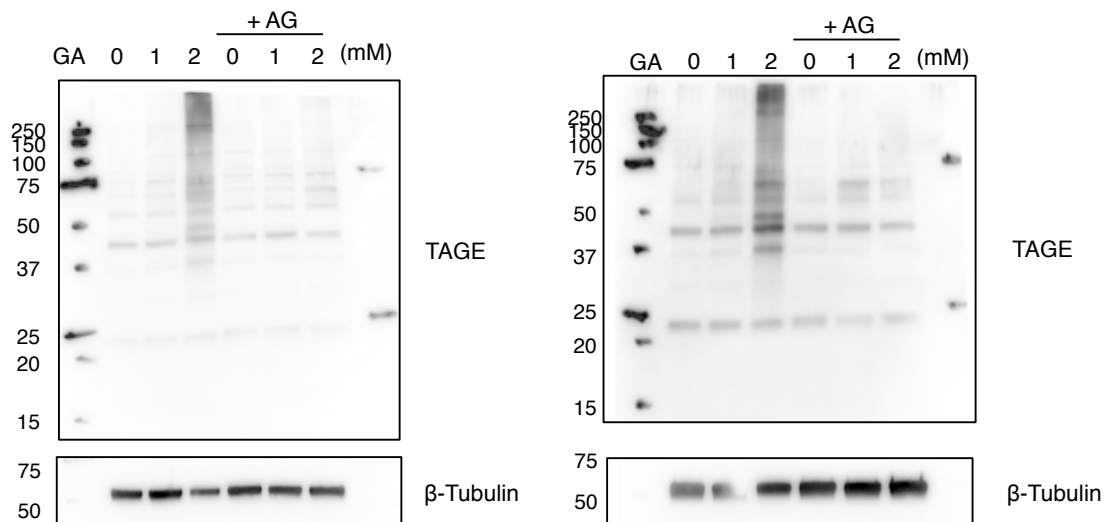

**Figure S1.** Western blot analysis of TAGE in MC3T3-E1 cells. Cell extracts were prepared from MC3T3-E1 cells after a treatment with (4 mM) or without AG for 2 h and then incubated with (1 or 2 mM) or without GA for 24 h. Proteins were probed with an anti-TAGE antibody. β-Tubulin was used as a loading control.

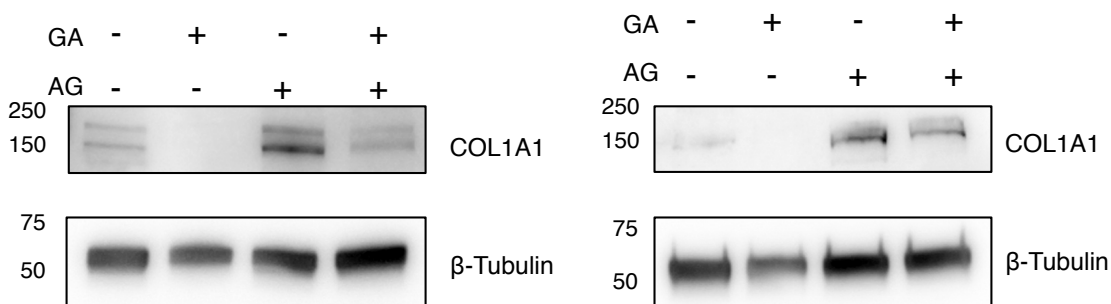

**Figure S2.** Western blot analysis of the intracellular COL1A1 protein. MC3T3-E1 cells were treated with (4 mM) or without AG for 2 h followed by with (2 mM) or without GA for 24 h, and cell extracts were then prepared. β-Tubulin was used as the loading control

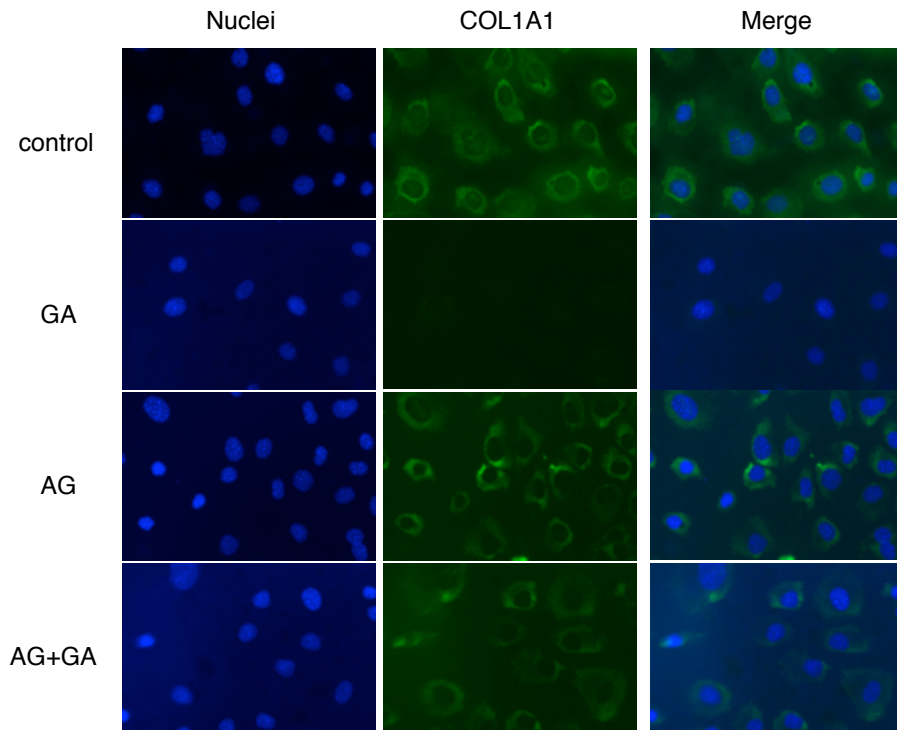

**Figure S3.** Fluorescence images of nuclei (blue fluorescence) and COL1A1 (green fluorescence) in MC3T3-E1 cells treated with (4 mM) or without AG for 2 h followed by with (1 mM) or without GA for 24 h. The magnification for the figure is  $\times 40$ .
